# Supplementary material
Source: Springer Nature journal article supplement (https://www.springermedizin.de/resource/supplementary/12889_2014_7114_MOESM2_ESM.pdf/9499886)
Supplement: MOESM2 [file 9499886]

**Additional file 2** Sample items of the SAHL-D comprehension test (translated from Dutch)  
Correct alternatives are in bold font; the 'related' distractor is underlined.

*Orthodontics*

- a. **Specialty concerned with irregularities in the teeth**
- b. Specialty concerned with the prevention of cavities in teeth
- c. Specialty concerned with jaw surgery
- d. I do not know

*Psoriasis*

- a. **Disease leading to red dry spots on the skin**
- b. Brown spots, especially on the face
- c. Dry skin because of a lack of sebaceous glands
- d. I do not know
